# Supplementary material
Source: Royal Society of Chemistry journal article supplement (doi:10.1039/d6tc00992a)
Supplement: d6tc00992a1.pdf [file d6tc00992a1.pdf]

## Supplementary Information

### Contact Engineering of MoS<sub>2</sub> Synaptic Transistors via Reactive Ion Etching

Airong Liu<sup>a</sup>, Chaoqi Dai<sup>a</sup>, Yutong Wei<sup>a</sup>, Fangfei Ming<sup>a\*</sup>, Shaozhi Deng<sup>a</sup>

<sup>a</sup> *State Key Laboratory of Optoelectronic Materials and Technologies, School of Electronics and Information Technology and Guangdong Province Key Laboratory of Display Material, Sun Yat-sen University, Guangzhou 510275, China*

\* Corresponding author: [mingff@mail.sysu.edu.cn](mailto:mingff@mail.sysu.edu.cn)

## Supplementary Information:

Supplementary Figure S1. Raman evolution of mono-, bi-, and trilayer MoS<sub>2</sub> flakes on Au after successive RIE cycles.

Supplementary Figure S2. Optical micrographs of the same MoS<sub>2</sub> flake on SiO<sub>2</sub>/Si from the pristine state to after seven successive RIE cycles.

Supplementary Figure S3. Additional XPS analysis of pristine and contact-etched MoS<sub>2</sub> on Au.

Supplementary Figure S4. Comparison of the fabrication processes for pristine and contact-etched MoS<sub>2</sub> FETs.

Supplementary Figure S5. AFM characterization of the contact-etched electrode edge.

Supplementary Figure S6. Transmission line method (TLM) analysis of the pristine and contact-etched MoS<sub>2</sub> FETs.

Supplementary Figure S7. Extraction of threshold voltage ( $V_{TH}$ ), subthreshold swing (SS), on/off current ratio, and field-effect mobility ( $\mu_{FE}$ ) from the transfer curves.

Supplementary Figure S8. Statistical distributions of threshold voltage and field-effect mobility for multiple fabricated devices.

Supplementary Figure S9. Extraction of memory window ( $\Delta V_{TH}$ ) and effective trap density ( $N_{it}$ ) from hysteresis curves for devices with different etching cycles.

Supplementary Figure S10. Hysteresis curves with various sweep ranges for devices with different etching cycles.

Supplementary Figure S11. Hysteresis curves measured under asymmetric gate-voltage sweep ranges for devices with different etching cycles.

Supplementary Figure S12. Stability of hysteresis curves over ten consecutive measurements.

Supplementary Figure S13. Hysteresis curves showing competing hysteresis features from another two-cycle contact-etched MoS<sub>2</sub> device.

Supplementary Figure S14. Statistics of hysteresis types for devices with different etching-cycle numbers.

Supplementary Figure S15. Pulse-modulated synaptic response of the pristine MoS<sub>2</sub> FET.

Supplementary Table S1. Comparison of representative MoS<sub>2</sub>-based devices modified by plasma treatment and related MoS<sub>2</sub>-based synaptic devices.

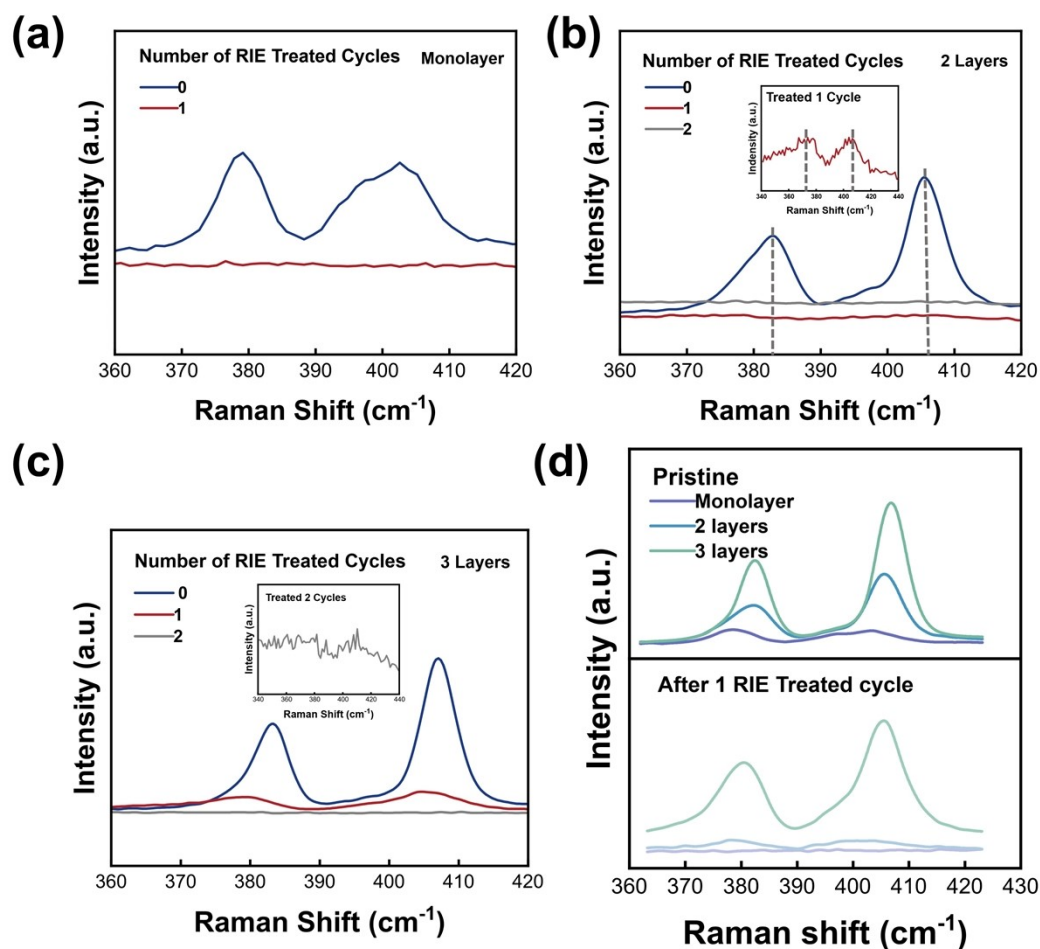

**Figure S1. Raman evolution of mono-, bi-, and trilayer MoS<sub>2</sub> flakes on Au after successive RIE cycles.** (a) Raman spectra of monolayer MoS<sub>2</sub> on Au before and after one etching cycle. (b) Raman spectra of bilayer MoS<sub>2</sub> on Au before treatment and after one and two etching cycles; inset: enlarged view of the weak Raman signal after one etching cycle. (c) Raman spectra of trilayer MoS<sub>2</sub> on Au before treatment and after one and two etching cycles; inset: enlarged view of the weak Raman signal after two etching cycles. (d) Comparison of the Raman spectra of pristine mono-, bi-, and trilayer MoS<sub>2</sub> flakes on Au and their evolution after one etching cycle. The progressive weakening of the Raman response with decreasing thickness supports the stepwise thinning behavior induced by RIE.

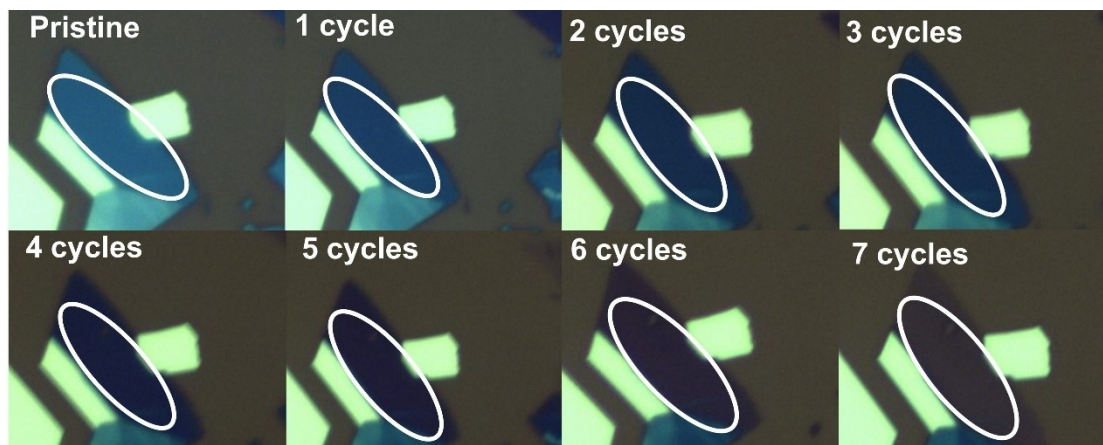

**Figure S2.** Optical micrographs of the same MoS<sub>2</sub> flake on SiO<sub>2</sub>/Si from the pristine state to after seven successive RIE cycles. The circled area marks the tracked region.

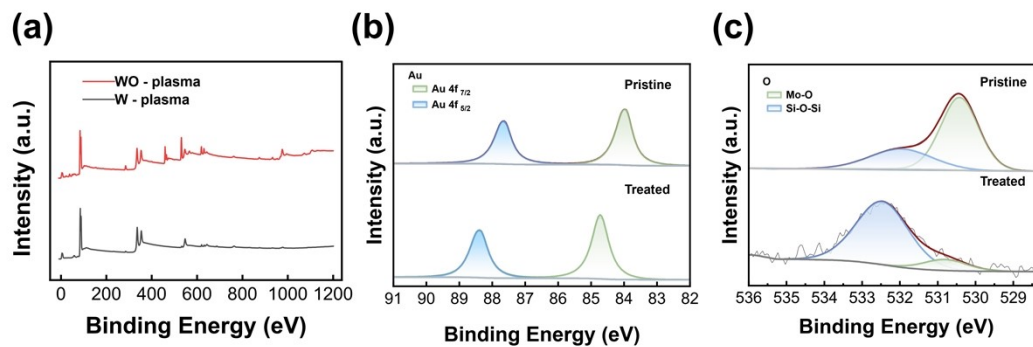

**Figure S3. Additional XPS analysis of pristine and contact-etched MoS<sub>2</sub> on Au.** (a) XPS survey spectra of samples without and with plasma treatment. (b) High-resolution Au 4f spectra of pristine and contact-etched samples. (c) High-resolution O 1s spectra, showing that the reduced Mo–O-related contribution and the enhanced Si–O–Si signal after etching are consistent with thinning of the MoS<sub>2</sub> layer and the increased contribution of the underlying SiO<sub>2</sub>/Si substrate to the XPS signal.

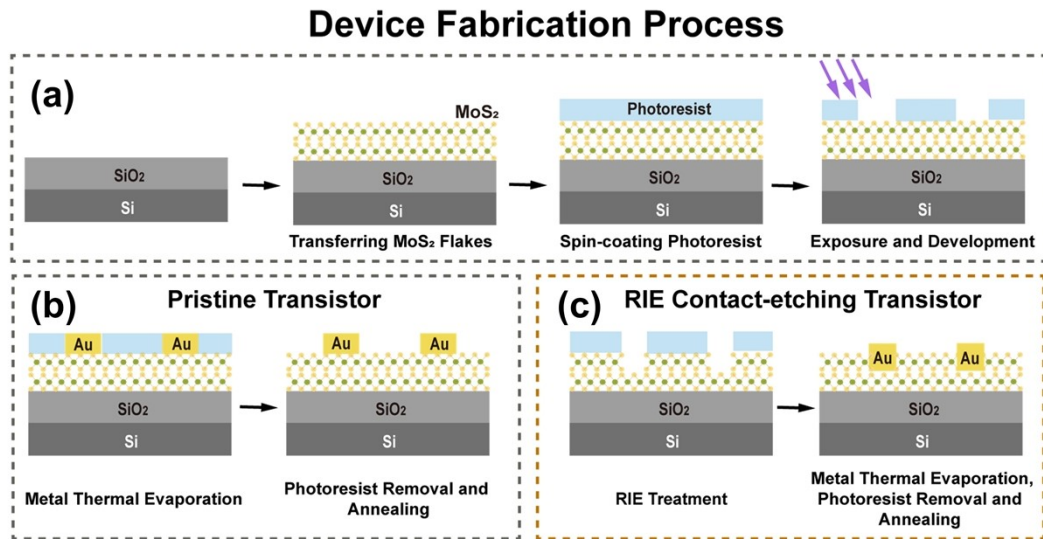

**Figure S4. Comparison of the fabrication processes for pristine and contact-etched MoS<sub>2</sub> FETs.** (a) Shared fabrication steps for both device types, including mechanical exfoliation of MoS<sub>2</sub> flakes onto SiO<sub>2</sub>/Si substrates, followed by photoresist coating, soft baking, UV exposure, and development to define the electrode pattern. (b) Subsequent process for the pristine devices: direct deposition of Cr/Au electrodes after development, followed by lift-off, forming conventional top contacts. (c) Subsequent process for the contact-etched devices: an additional RIE step is introduced after development and before Cr/Au deposition, followed by lift-off, producing top electrodes with edge-contact characteristics. Both device types were finally annealed at 200 °C for 2 h.

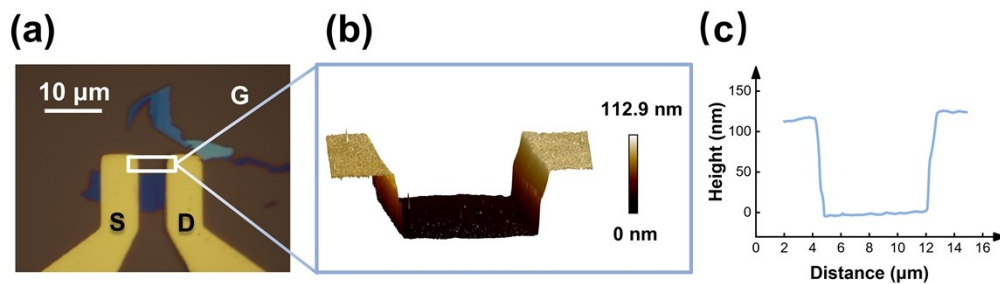

**Figure S5. AFM characterization of the contact-etched electrode edge.** (a) Optical image of a contact-etched device. (b) AFM 3D topographic image acquired from the boxed region in (a). (c) Corresponding height profile. A slight non-vertical feature is visible at the electrode edge, which is likely related to the resolution limits of the photolithography and development processes. No obvious additional residual layer attributable to the  $\text{CF}_4/\text{Ar}$  etching step is observed on the substrate near the electrode edge, although a trace amount of fabrication-related resist residue cannot be completely excluded.

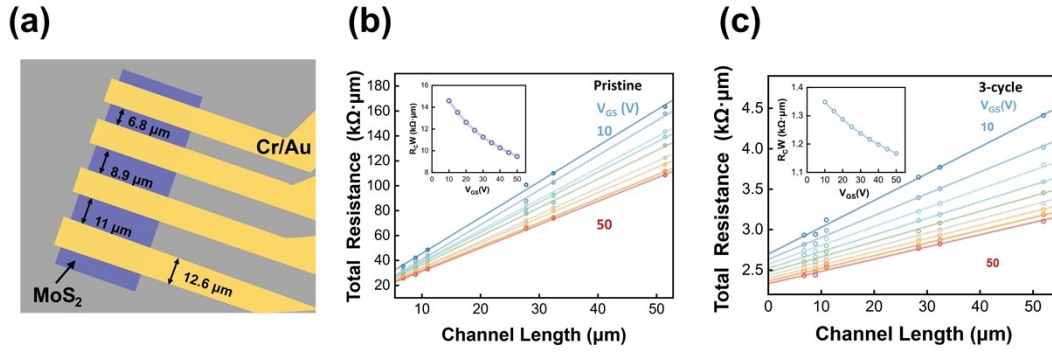

**Figure S6. Transmission line method (TLM) analysis of the pristine and contact-etched MoS<sub>2</sub> FETs.** (a) Schematic illustration of the corresponding TLM test structure. (b, c) Total resistance as a function of channel length measured at different  $V_{GS}$ , together with the extracted channel-width-normalized contact resistance  $R_c$  (inset), for (b) pristine and (c) three-cycle contact-etched MoS<sub>2</sub> FETs.

Total resistance normalized by channel width ( $R_{total} \cdot W$ ) as a function of channel length ( $L$ ) measured at different gate voltages ( $V_{GS}$ ). The total resistance was extracted from the low-bias linear regime using  $R_{total} = V_{DS} / I_{DS}$ . According to the TLM relationship,

$$R_{total} \cdot W = 2R_c \cdot W + R_{sh} \cdot L \#(S3)$$

where  $R_c$  is the contact resistance of a single contact,  $W$  is the channel width, and  $R_{sh}$  is the sheet resistance of the MoS<sub>2</sub> channel. Therefore, linear fitting of the  $R_{total} \cdot W - L$  plots at each  $V_{GS}$  gives the sheet resistance from the slope and the contact resistance from half of the y-intercept. The inset shows the extracted  $R_c \cdot W$  as a function of  $V_{GS}$ , indicating that the contact resistance decreases with increasing gate bias. The minimum  $R_c \cdot W$  of the pristine device is about 9.48 k $\Omega \cdot \mu\text{m}$  at  $V_{GS} = 50$  V, whereas that of the three-cycle contact-etched device is about 1.15 k $\Omega \cdot \mu\text{m}$ .

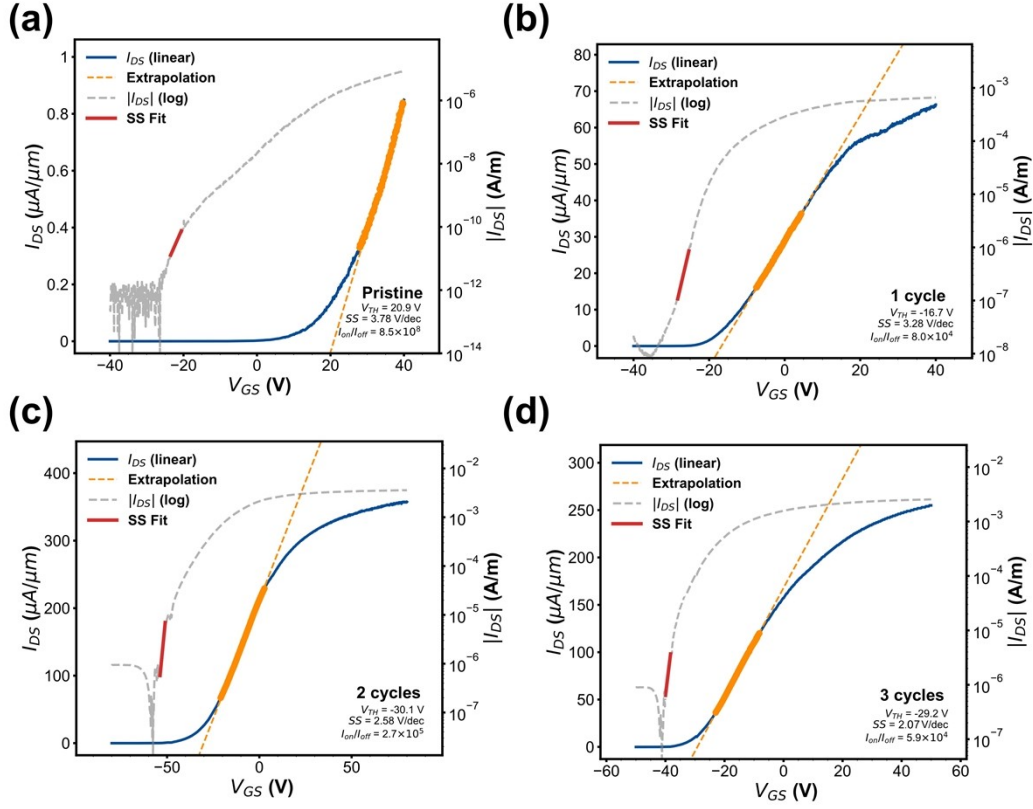

**Figure S7. Extraction of threshold voltage ( $V_{TH}$ ), subthreshold swing (SS), on/off current ratio, and field-effect mobility ( $\mu_{FE}$ ) from the transfer curves.** The curves are from (a) pristine, (b) one-cycle, (c) two-cycle, and (d) three-cycle contact-etched MoS<sub>2</sub> FETs. In each panel, the blue curve shows the linear-scale transfer characteristic used for  $V_{TH}$  extraction, and the gray curve shows the semi-logarithmic transfer characteristic used for SS and on/off ratio extraction.  $V_{TH}$  was determined from the linear extrapolation of the  $I_{DS}$ - $V_{GS}$  curve in the linear-current regime. SS was obtained from the fitted subthreshold region according to:

$$SS = \frac{dV_{GS}}{d(\log_{10}|I_{DS}|)} \#(S1)$$

The on/off ratio was calculated as  $|I_{ON}|/|I_{OFF}|$ , where  $I_{ON}$  and  $I_{OFF}$  are the maximum and minimum drain currents extracted from the same transfer curve, respectively. The field-effect mobility ( $\mu_{FE}$ ) was calculated according to:

$$\mu_{FE} = \frac{L}{W \cdot C_{ox} \times V_{DS}} g_m \#(S2)$$

where  $g_m = dI_{DS}/dV_{GS}$  in the linear regime.

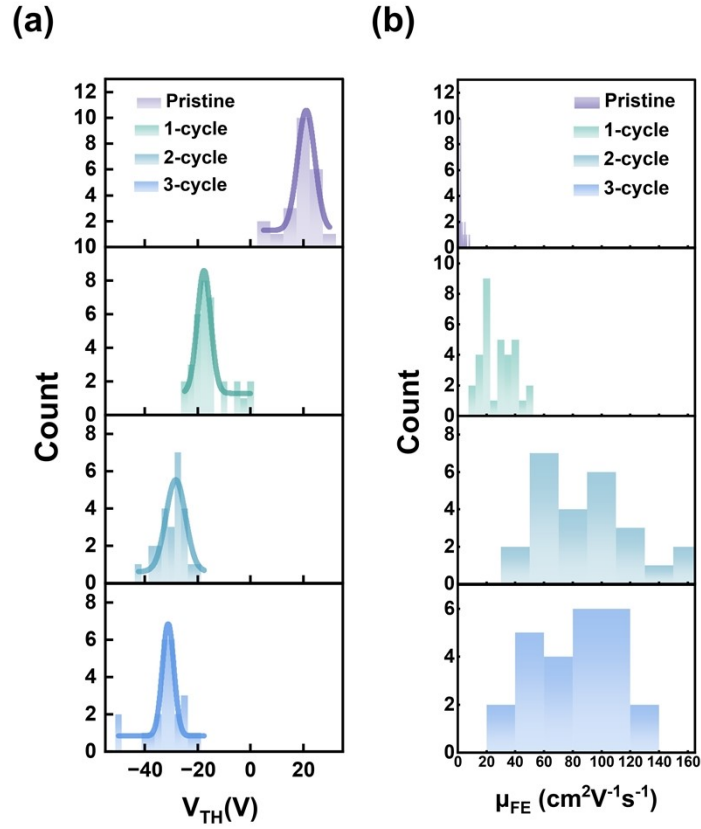

**Figure S8. Statistical distributions of threshold voltage and field-effect mobility for multiple fabricated devices.** Distributions of the extracted (a) threshold voltage ( $V_{TH}$ ) and (b) field-effect mobility ( $\mu_{FE}$ ) for pristine, one-cycle, two-cycle, and three-cycle contact-etched MoS<sub>2</sub> devices. The numbers of analyzed devices are 23, 33, 25, and 25 for the pristine, one-cycle, two-cycle, and three-cycle devices, respectively. The fitted curves are included as guides to the distribution trend. Compared with the pristine devices, the contact-etched devices exhibit an overall negative shift in  $V_{TH}$  and generally higher  $\mu_{FE}$ . The devices presented in the main text were selected by jointly considering  $V_{TH}$ ,  $\mu_{FE}$ , hysteresis-window width, current level, and overall electrical behavior.

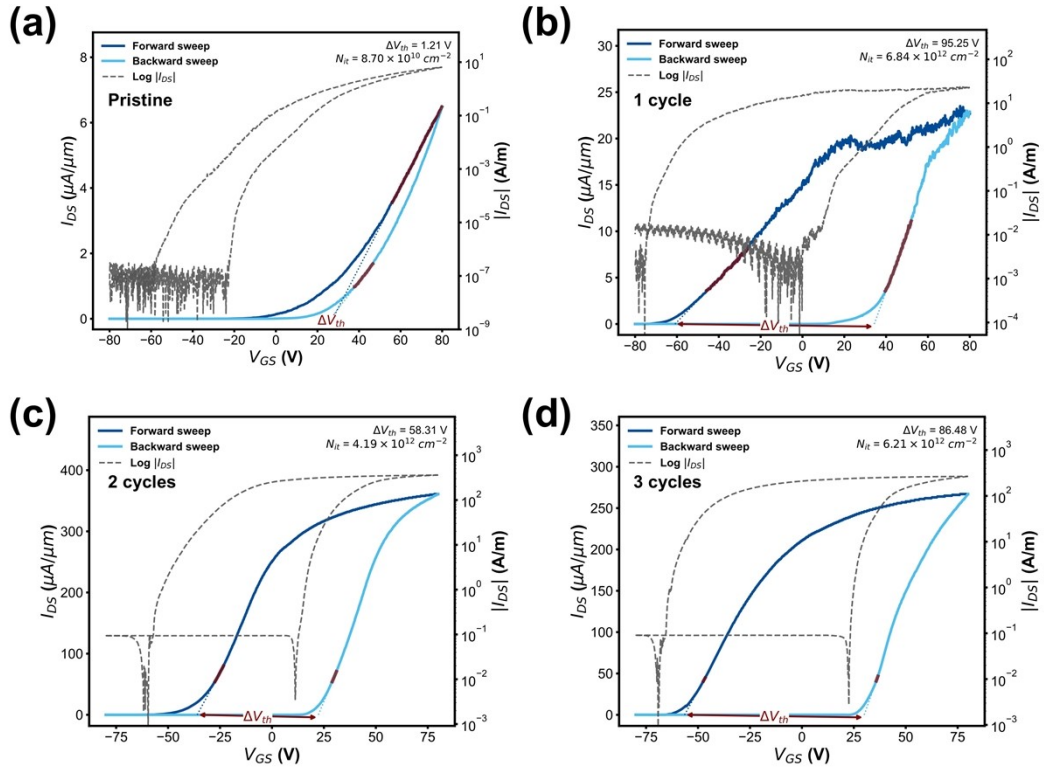

**Figure S9. Extraction of memory window ( $\Delta V_{TH}$ ) and effective trap density ( $N_{it}$ ) from hysteresis curves for devices with different etching cycles.** The curves are obtained from (a) pristine, (b) one-cycle, (c) two-cycle, and (d) three-cycle contact-etched MoS<sub>2</sub> FETs. For each panel, the threshold voltages of the forward and backward sweeps were extracted independently by linear extrapolation of the  $I_{DS}$ - $V_{GS}$  curves. The memory window was determined as  $\Delta V_{TH} = |V_{TH,forward} -$

$V_{TH,backward}|$ . The effective trap density was estimated using 
$$N_{it} = \frac{C_i \Delta V_{TH}}{q}$$
.

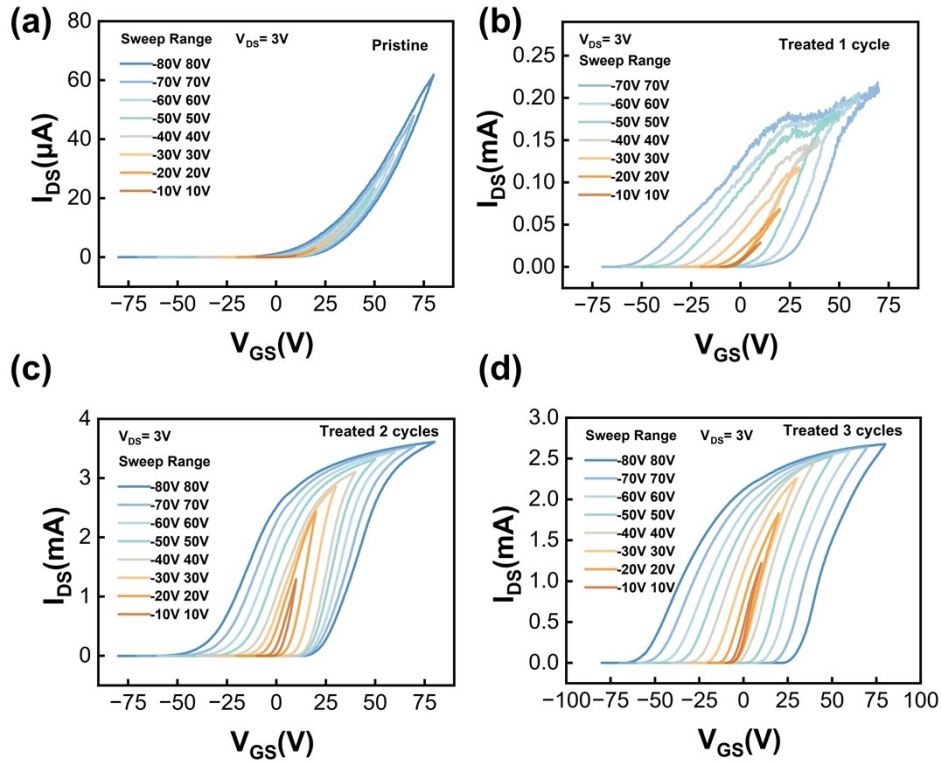

**Figure S10. Hysteresis curves with various sweep ranges for devices with different etching cycles.** The curves are obtained from (a) pristine, (b) one-cycle, (c) two-cycle, and (d) three-cycle contact-etched MoS<sub>2</sub> FETs. The electrical characteristics were measured at  $V_{DS} = 3$  V while the gate-voltage sweep range was decreased.

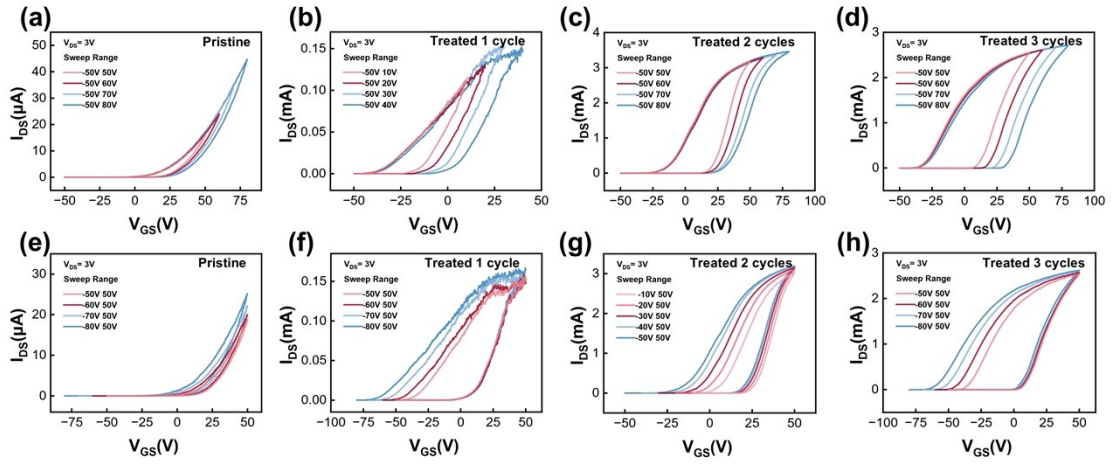

**Figure S11. Hysteresis curves measured under asymmetric gate-voltage sweep ranges for devices with different etching cycles.** The curves are obtained from pristine (a, e), one-cycle (b, f), two-cycle (c, g), and three-cycle contact-etched (d, h) MoS<sub>2</sub> FETs. In (a–d), the negative sweep limit was fixed at –50 V while the positive sweep limit was increased stepwise. In (e–h), the positive sweep limit was fixed at +50 V while the negative sweep limit was extended stepwise. The measurements were performed at  $V_{DS} = 3$  V. The asymmetric sweep ranges mainly affect the corresponding branches of the hysteresis curves, resulting in different extracted memory windows.

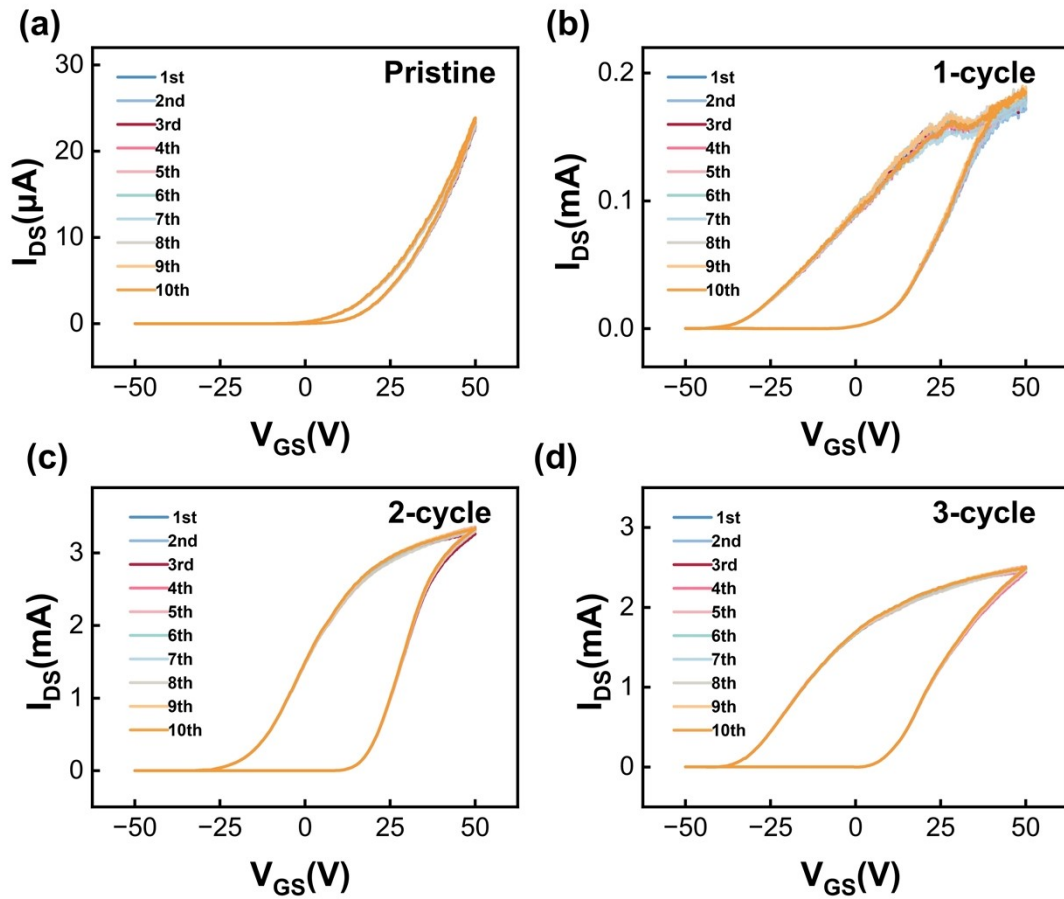

**Figure S12. Stability of hysteresis curves over ten consecutive measurements.** (a) Pristine, (b) one-cycle, (c) two-cycle, and (d) three-cycle contact-etched MoS<sub>2</sub> FETs. The measurements were performed at  $V_{DS} = 3$  V. The curves largely overlap for each device, indicating good operational stability with only slight shifts during repeated measurements.

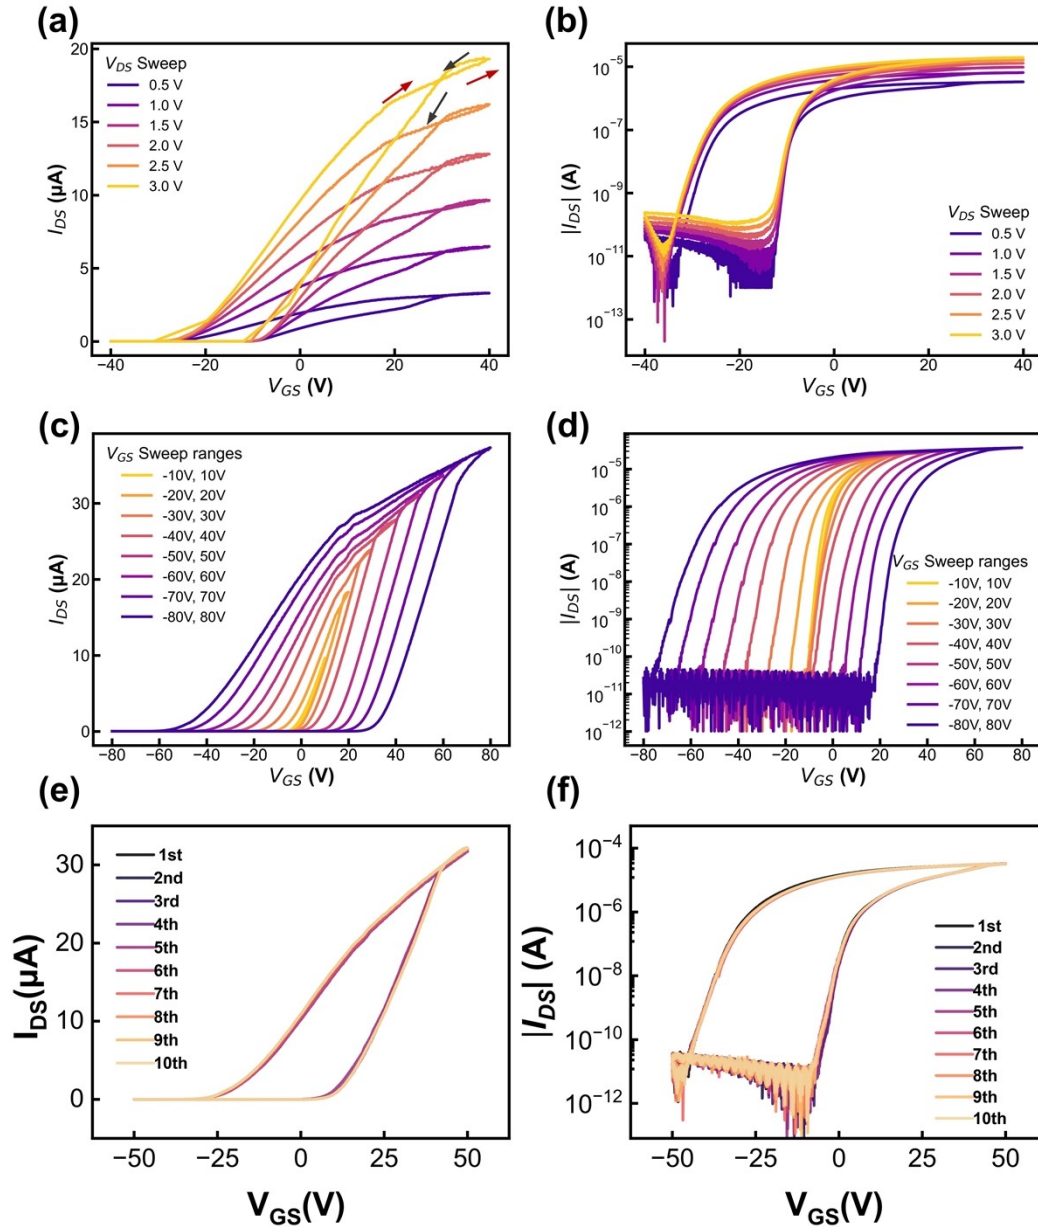

**Figure S13. Hysteresis curves showing competing hysteresis features from another two-cycle contact-etched MoS<sub>2</sub> device.** (a, b) Linear- and logarithmic-scale hysteresis curves measured at different  $V_{DS}$  values from 0.5 to 3.0 V. (c, d) Linear- and logarithmic-scale hysteresis curves measured under different bidirectional gate-voltage sweep ranges from  $\pm 10$  V to  $\pm 80$  V. (e, f) Ten consecutive hysteresis scans displayed on linear and logarithmic scales, respectively. In panels (a) and (c), the hysteresis loops are predominantly clockwise, while a weak reversed feature appears near the high- $V_{GS}$  end, forming a local counterclockwise loop and giving rise to a faint figure-eight-like shape. The repeated scans in (e) and (f) show that this small counterclockwise hysteresis feature is reproducibly observed.

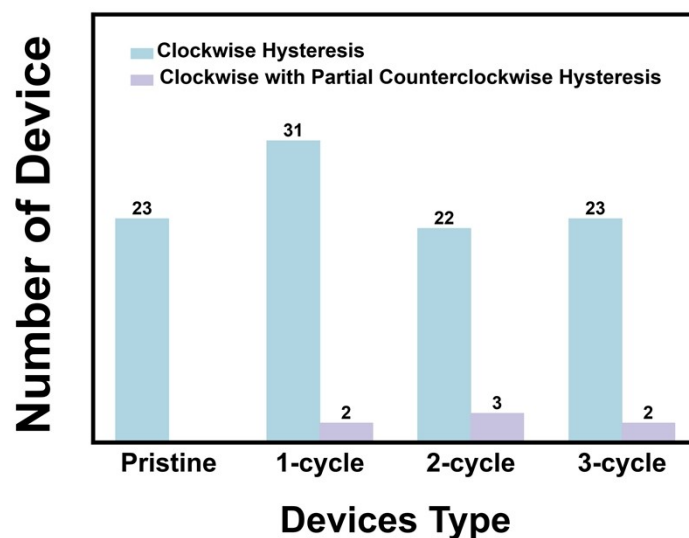

**Figure S14. Statistics of hysteresis types for devices with different etching-cycle numbers.** The numbers of devices exhibiting purely clockwise hysteresis and clockwise hysteresis with a partial counterclockwise feature are summarized for pristine, one-cycle, two-cycle, and three-cycle devices. The numbers of analyzed devices are 23, 33, 25, and 25 for the pristine, one-cycle, two-cycle, and three-cycle devices, respectively. Purely clockwise hysteresis is the dominant behavior in all groups, whereas devices showing a partial counterclockwise component account for only a small fraction of the etched devices. No such mixed hysteresis feature is observed in the pristine devices.

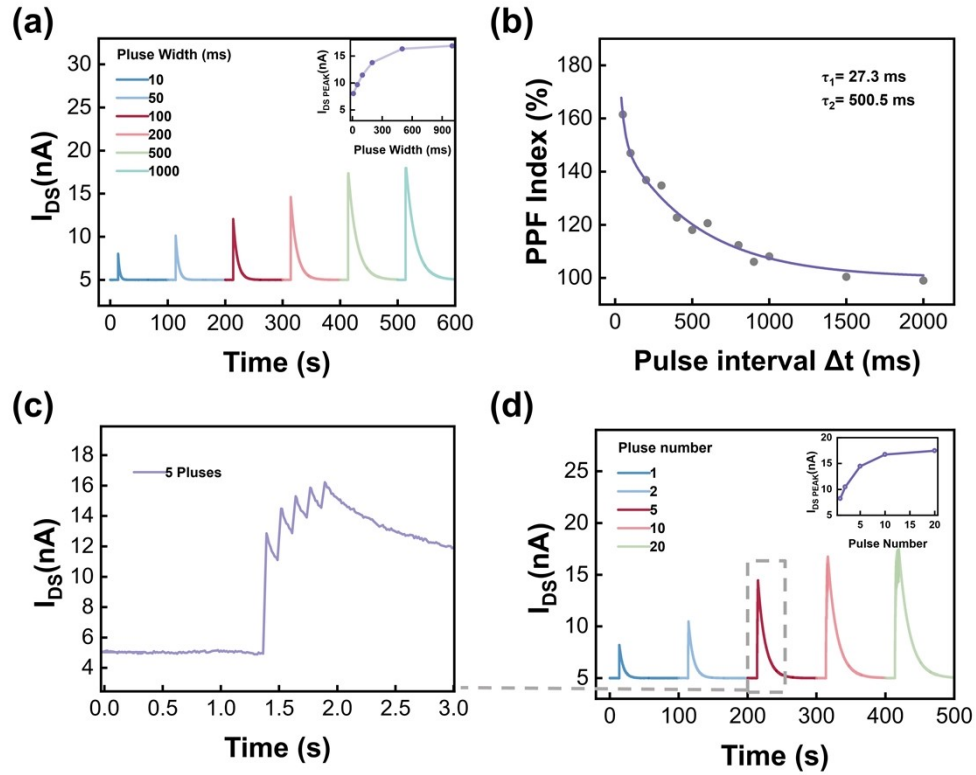

**Figure S15. Pulse-modulated synaptic response of the pristine MoS<sub>2</sub> FET.** (a) Transient current response to single gate pulses with different pulse widths; inset: extracted peak current as a function of pulse width. (b) PPF index as a function of pulse interval ( $\Delta t$ ), together with a bi-exponential fit. (c) Transient response under five consecutive pulses. (d) Transient current response under repeated pulses with different pulse numbers; inset: extracted peak current as a function of pulse number. The pulse measurements were performed at  $V_{DS} = 1$  V.

**Table S1. Comparison of representative MoS<sub>2</sub>-based devices modified by plasma treatment and related MoS<sub>2</sub>-based synaptic devices.**

| Ref.            | Treatment Species                | Modified region | Main function                                                         | Processing Parameter                                                        | Device configuration                                                     | Representative device metrics                                                                                                                                                                                                                                                                                                                                               |
|-----------------|----------------------------------|-----------------|-----------------------------------------------------------------------|-----------------------------------------------------------------------------|--------------------------------------------------------------------------|-----------------------------------------------------------------------------------------------------------------------------------------------------------------------------------------------------------------------------------------------------------------------------------------------------------------------------------------------------------------------------|
| <b>Our work</b> | CF <sub>4</sub> /Ar (1:1) Plasma | Contact region  | Hybrid top/edge contact, ion-related modification, defect engineering | RIE<br>Power: 27 W<br>Time: 7 s<br>Flow rate: 50 sccm<br>Pressure: 30 mTorr | Si/SiO <sub>2</sub> back-gated few-layer MoS <sub>2</sub> FET            | $\mu_{FE}$ : 142.4 cm <sup>2</sup> V <sup>-1</sup> s <sup>-1</sup> ,<br>R <sub>C</sub> : 1.15 k $\Omega$ · $\mu$ m,<br>N <sub>it</sub> : 6×10 <sup>12</sup> cm <sup>-2</sup> ,<br>I <sub>on</sub> : 366 $\mu$ A $\mu$ m <sup>-1</sup> ,<br>$\Delta V_{TH}$ : 95.25 V at V <sub>G</sub> sweep from -80 to 80 V,<br>$\tau_1$ = 32.4 ms,<br>$\tau_2$ = 932.6 ms,<br>PPF = 212% |
| <b>1</b>        | CF <sub>4</sub> Plasma           | Contact region  | Ion implantation                                                      | RIE<br>Power: 18 W<br>Time: 5 s<br>Flow rate: 50 sccm                       | Si/SiO <sub>2</sub> back-gated few-layer MoS <sub>2</sub> FET            | I <sub>on</sub> /I <sub>off</sub> : 10 <sup>7</sup> -10 <sup>8</sup> ,<br>$\mu_{FE}$ : 15.1 cm <sup>2</sup> V <sup>-1</sup> s <sup>-1</sup> ,<br>R <sub>C</sub> : 1.96 k $\Omega$ · $\mu$ m<br>I <sub>on</sub> : 90-130 $\mu$ A· $\mu$ m <sup>-1</sup>                                                                                                                      |
| <b>2</b>        | Ar Plasma                        | Contact region  | S-vacancy engineering, cleaning                                       | Mild Ar plasma<br>Power: 6 W<br>Time: 35 s<br>Flow rate: 12 sccm            | Si/SiO <sub>2</sub> back-gated monolayer MoS <sub>2</sub> FET            | I <sub>on</sub> /I <sub>off</sub> : 4 × 10 <sup>9</sup> ,<br>$\mu_{FE}$ : 153 cm <sup>2</sup> V <sup>-1</sup> s <sup>-1</sup> ,<br>R <sub>C</sub> : 1.7 k $\Omega$ · $\mu$ m,<br>I <sub>on</sub> : 342 $\mu$ A $\mu$ m <sup>-1</sup>                                                                                                                                        |
| <b>3</b>        | Ar Plasma                        | Contact region  | Edge contact                                                          | ICP<br>-                                                                    | HfO <sub>2</sub> /Si back-gated monolayer MoS <sub>2</sub> FET           | I <sub>on</sub> /I <sub>off</sub> : 6 × 10 <sup>7</sup> ,<br>SS: 150 mV/dec,<br>R <sub>C</sub> : 1.25 k $\Omega$ · $\mu$ m,<br>I <sub>on</sub> : 436 $\mu$ A $\mu$ m <sup>-1</sup>                                                                                                                                                                                          |
| <b>4</b>        | Ar Plasma                        | Contact region  | Edge contact                                                          | Ion beam source<br>Ion energy: 600 eV                                       | SiO <sub>2</sub> /Si back-gated monolayer/3L MoS <sub>2</sub> FET        | R <sub>C</sub> : 30.5 k $\Omega$ · $\mu$ m,<br>n <sub>2D</sub> = 1.2×10 <sup>13</sup> cm <sup>-2</sup>                                                                                                                                                                                                                                                                      |
| <b>5</b>        | Ar Plasma                        | Contact region  | Edge contact                                                          | End-Hall ion source<br>Time: 300 s                                          | SiO <sub>2</sub> /Si back-gated monolayer/few-layer MoS <sub>2</sub> FET | I <sub>on</sub> /I <sub>off</sub> ratio: 10 <sup>8</sup> ,<br>$\mu_{FE}$ : 38 cm <sup>2</sup> V <sup>-1</sup> s <sup>-1</sup> ,<br>R <sub>C</sub> : 200 k $\Omega$ · $\mu$ m                                                                                                                                                                                                |

|    |                                                  |                                                |                                                    |                                                                                                  |                                                                                                              |                                                                                                                                                                                                            |
|----|--------------------------------------------------|------------------------------------------------|----------------------------------------------------|--------------------------------------------------------------------------------------------------|--------------------------------------------------------------------------------------------------------------|------------------------------------------------------------------------------------------------------------------------------------------------------------------------------------------------------------|
| 6  | Ar/O <sub>2</sub> (1:4) Plasma                   | Contact region                                 | Ambipolar transport, Schottky barrier tailoring    | ICP<br>Power: 100 W<br>Time: 30 s<br>Pressure: 3×10 <sup>-3</sup> mbar.                          | SiO <sub>2</sub> /Si back-gated few-layer MoS <sub>2</sub> FET                                               | I <sub>on</sub> /I <sub>off</sub> ratio: 10 <sup>3</sup> ,<br>μ <sub>FE</sub> : 30 cm <sup>2</sup> V <sup>-1</sup> s <sup>-1</sup> ,<br>Schottky barrier height: 0.58 eV,<br>Device resistance: 1.7 MΩ     |
| 7  | FG (5% H <sub>2</sub> in N <sub>2</sub> ) Plasma | MoS <sub>2</sub> / high-k dielectric interface | High-k dielectric integration, surface passivation | ALD: remote forming gas plasma<br>Time:60s                                                       | Al <sub>2</sub> O <sub>3</sub> top-gated few-layer MoS <sub>2</sub> FET                                      | I <sub>on</sub> /I <sub>off</sub> ratio: 10 <sup>9</sup> ,<br>μ <sub>FE</sub> : 45.03 cm <sup>2</sup> V <sup>-1</sup> s <sup>-1</sup> ,<br>SS: 85 mV/dec                                                   |
| 8  | O <sub>2</sub> Plasma                            | MoS <sub>2</sub> channel/contact region        | Phase transition                                   | ICP<br>Power: 7.2 W<br>DC: 10 mA<br>Time: 30 s<br>Pressure: 5 mTorr.                             | SiO <sub>2</sub> /Si back-gated few-layer MoS <sub>2</sub> FET                                               | I <sub>on</sub> /I <sub>off</sub> ratio: 10 <sup>4</sup> ,<br>μ <sub>FE</sub> : 237 cm <sup>2</sup> V <sup>-1</sup> s <sup>-1</sup> ,<br>R <sub>C</sub> : 4 kΩ·μm,<br>Conductivity: 83.8 S m <sup>-1</sup> |
| 9  | BCl <sub>3</sub> Plasma                          | MoS <sub>2</sub> /high-k dielectric interface  | Doping, High-k dielectric integration              | ICP<br>Power: 250 W<br>Time: 300 s<br>Pressure: 2.1 mTorr.                                       | Al <sub>2</sub> O <sub>3</sub> top-gated few-layer MoS <sub>2</sub> FET                                      | I <sub>on</sub> /I <sub>off</sub> ratio: 10 <sup>6</sup> ,<br>μ <sub>FE</sub> : 9 cm <sup>2</sup> V <sup>-1</sup> s <sup>-1</sup> ,<br>SS: 140 mV/dec                                                      |
| 10 | SF <sub>6</sub> Plasma                           | MoS <sub>2</sub> channel                       | Etching , doping                                   | Power: 10 W<br>Time: 30–50 s<br>Flow: 10 sccm<br>Pressure: 1 Torr                                | SiO <sub>2</sub> /Si back-gated monolayer MoS <sub>2</sub> FET                                               | I <sub>on</sub> /I <sub>off</sub> ratio: 1.3 × 10 <sup>7</sup><br>μ <sub>FE</sub> : 16.2 cm <sup>2</sup> ·V <sup>-1</sup> ·s <sup>-1</sup>                                                                 |
| 11 | Ar Plasma                                        | MoS <sub>2</sub> channel                       | S-vacancy defect                                   | Plasma cleaner<br>Power: 10 W<br>Time: 5 s<br>Pressure: 0.3 mbar                                 | SiO <sub>2</sub> /Si back-gated monolayer MoS <sub>2</sub> memristive/synaptic FET                           | I <sub>on</sub> /I <sub>off</sub> ratio: 1.3 × 10 <sup>7</sup><br>NLF: 2.81<br>MNIST accuracy: 97%                                                                                                         |
| 12 | Toluene vapor                                    | Whole devices                                  | S-vacancy defect                                   | Time: 20 min<br>Flow rate: 10 sccm<br>Pressure: 10 <sup>-2</sup> Torr<br>Temperature: 350–450 °C | Vertical MoS <sub>2</sub> synaptic device with MoS <sub>2</sub> sandwiched between top and bottom electrodes | τ <sub>1</sub> = 49.8 ms,<br>τ <sub>2</sub> = 265 ms,<br>PPF: 170%                                                                                                                                         |

|    |                       |                  |                             |   |                                                                                     |                                                                                                                                  |
|----|-----------------------|------------------|-----------------------------|---|-------------------------------------------------------------------------------------|----------------------------------------------------------------------------------------------------------------------------------|
| 13 | O <sub>2</sub> Plasma | Graphdiyne (GDY) | Etching, defect engineering | - | Graphdiyne /SiO <sub>2</sub> /Si back-gated monolayer MoS <sub>2</sub> synaptic FET | I <sub>on</sub> /I <sub>off</sub> : 8 × 10 <sup>7</sup> ,<br>ΔV <sub>TH</sub> : 90 V at V <sub>G</sub><br>sweep from -80 to 80 V |
|----|-----------------------|------------------|-----------------------------|---|-------------------------------------------------------------------------------------|----------------------------------------------------------------------------------------------------------------------------------|

---

## References

- 1 A. K. Rai, A. A. Shah, J. Kumar, S. Chattaraj, A. B. Dar, U. Patbhaje and M. Shrivastava, *ACS Nano*, 2024, **18**, 6215–6228.
- 2 J. Xiao, K. Chen, X. Zhang, X. Liu, H. Yu, L. Gao, M. Hong, L. Gu, Z. Zhang and Y. Zhang, *Small Methods*, 2023, **7**, 2300611.
- 3 J. Xiao, X. Xiong, X. Shi, S. Liu, S. Zhu, Y. Zhang, R. Huang and Y. Wu, *Research*, 2025, **8**, 0593.
- 4 Z. Cheng, Y. Yu, S. Singh, K. Price, S. G. Noyce, Y.-C. Lin, L. Cao and A. D. Franklin, *Nano Lett.*, 2019, **19**, 5077–5085.
- 5 A. Conde-Rubio, X. Liu, G. Boero and J. Brugger, *ACS Appl. Mater. Interfaces*, 2022, **14**, 42328–42336.
- 6 F. Giannazzo, G. Fisichella, G. Greco, S. Di Franco, I. Deretzis, A. La Magna, C. Bongiorno, G. Nicotra, C. Spinella, M. Scopelliti, B. Pignataro, S. Agnello and F. Roccaforte, *ACS Appl. Mater. Interfaces*, 2017, **9**, 23164–23174.
- 7 X. Wang, T.-B. Zhang, W. Yang, H. Zhu, L. Chen, Q.-Q. Sun and D. W. Zhang, *Appl. Phys. Lett.*, 2017, **110**, 053110.
- 8 Z. Cheng, S. He, X. Han, X. Zhang, L. Chen, S. Duan, S. Zhang and M. Xia, *J. Mater. Chem. C*, 2024, **12**, 2794–2802.
- 9 H. Lee, H. Kim, K. Kim, K. Jeong, M. Leem, S. Park, J. Kang, G. Yeom and H. Kim, *ACS Appl. Mater. Interfaces*, 2023, **15**, 46513–46519.
- 10 S.-S. Chee and M.-H. Ham, *Adv. Mater. Interfaces*, 2020, **7**, 2000762.
- 11 M. Rajput, S. K. Mallik, S. Chatterjee, A. Shukla, S. Hwang, S. Sahoo, G. V. P. Kumar and A. Rahman, *Commun. Mater.*, 2024, **5**, 190.
- 12 E. Lee, J. Kim, J. Park, J. Hwang, H. Jang, K. Cho and W. Choi, *ACS Appl. Mater. Interfaces*, 2023, **15**, 15839–15847.
- 13 J. Wen, W. Tang, Z. Kang, Q. Liao, M. Hong, J. Du, X. Zhang, H. Yu, H. Si, Z. Zhang and Y. Zhang, *Adv. Sci.*, 2021, **8**, 2101417.
